# Supplementary material for: CD33 Expression on Peripheral Blood Monocytes Predicts Efficacy of Anti-PD-1 Immunotherapy Against Non-Small Cell Lung Cancer
Source: PubMed Central journal article supplement (PMC9046782; doi:10.3389/fimmu.2022.842653), 2022-04-14
Supplement: Table_1.pdf [file Table_1.pdf]

**Supplementary Table 1**

| <b>ID</b> | <b>Response</b> | <b>Diagnosis</b> | <b>Treatment</b> | <b>Age/<br/>Sex</b> | <b>PFS<br/>(months)</b> | <b>Site</b> |
|-----------|-----------------|------------------|------------------|---------------------|-------------------------|-------------|
| 001       | NR              | Stage IV         | Nivolumab        | 71/F                | 3.02                    | MCC         |
| 002       | NR              | Stage III        | Nivolumab        | 64/F                | 1.87                    | MCC         |
| 003       | NR              | Stage IV         | Nivolumab        | 64/F                | 1.58                    | MCC         |
| 004       | NR              | Stage IV         | Nivolumab        | 46/F                | 4.10                    | MCC         |
| 005       | NR              | Stage IV         | Nivolumab        | 83/M                | 2.23                    | MCC         |
| 006       | NR              | Stage IV         | Nivolumab        | 80/F                | -                       | MCC         |
| 007       | NR              | Stage IIIB       | Nivolumab        | 72/M                | 4.10                    | IMIM        |
| 008       | NR              | Stage IVA        | Nivolumab        | 76/M                | 1.00                    | IMIM        |
| 009       | NR              | Stage IVB        | Nivolumab        | 66/M                | 0.60                    | IMIM        |
| 010       | NR              | Stage IVA        | Nivolumab        | 72/F                | 2.20                    | IMIM        |
| 011       | NR              | Stage IIB        | Pembrolizumab    | 58/M                | 1.60                    | IMIM        |
| 012       | NR              | Stage IIIB       | Pembrolizumab    | 67/M                | 1.40                    | IMIM        |
| 013       | NR              | Stage IVB        | Pembrolizumab    | 80/M                | 3.50                    | IMIM        |
| 014       | NR              | Stage IVB        | Pembrolizumab    | 77/M                | 0.50                    | IMIM        |
| 015       | R               | Stage IV         | Nivolumab        | 64/F                | 22.20                   | MCC         |
| 016       | R               | Stage III        | Nivolumab        | 46/F                | 33.53                   | MCC         |
| 017       | R               | Stage IV         | Nivolumab        | 79/M                | 33.43                   | MCC         |
| 018       | R               | Stage IV         | Pembrolizumab    | 84/M                | 8.57                    | MCC         |
| 019       | R               | Stage IVB        | Nivolumab        | 59/M                | 13.2                    | IMIM        |
| 020       | R               | Stage IIB        | Nivolumab        | 82/M                | 19.0                    | IMIM        |
| 021       | R               | Stage IV         | Nivolumab        | 62/M                | 13.5                    | IMIM        |
| 022       | R               | Stage IA         | Pembrolizumab    | 69/F                | 13.3                    | IMIM        |
| 023       | R               | Stage IV         | Nivolumab        | 65/M                | 13.4                    | IMIM        |
| 024       | R               | Stage IVB        | Nivolumab        | 71/M                | 8.8                     | IMIM        |
| 025       | R               | Stage IVB        | Pembrolizumab    | 70/M                | 13.7                    | IMIM        |
| 026       | R               | Stage IIB        | Pembrolizumab    | 74/M                | 11.3                    | IMIM        |
